2 **SARS-CoV-2 Omicron variant: exploring healthcare**  
3 **workers' awareness and perception of vaccine**  
4 **effectiveness: a national survey during the first week**  
5 **of WHO variant alert**

6 Mohamad-Hani Temsah<sup>a,b,c\*</sup>, Fadi Aljamaan<sup>a,d\*</sup>, Shuliweeh Alenezi<sup>a,e</sup>, Khalid Alhasan<sup>a,b</sup>,  
7 Abdulkarim Alrabiaah<sup>a,b</sup>, Rasha Assiri<sup>f</sup>, Rolan Bassrawi<sup>b</sup>, Ali Alhaboob<sup>a,b</sup>, Fatimah Alshahrani  
8<sup>a,e</sup>, Mohamad Alarabi<sup>a,d</sup>, Ali Alaraj<sup>h,i</sup>, Nasser S Alharbi, Rabih Halwani<sup>j,k</sup>, Amr Jamal<sup>l</sup>, Ayman  
9 Al-Eyadhy<sup>a,b</sup>, Naif AbdulMajeed<sup>b,m</sup>, Lina Alfarran<sup>n</sup>, Wafa Almashdali<sup>o</sup>, Fahad Al-Zamil<sup>a,b</sup>, Mazin  
10 Barry<sup>a,e,p</sup>, Ziad A. Memish<sup>q,r</sup>, Jaffar A. Al-Tawfiq<sup>s,t,u</sup> and Sarah Alsubaie<sup>a,b</sup>

- 11 a. College of Medicine, King Saud University, Riyadh11362, Saudi Arabia  
12 b. Pediatric Department, King Saud University Medical City, King Saud University,  
13 Riyadh11362, Saudi Arabia  
14 c. Prince Abdullah Ben Khaled Celiac Disease Research Chair, Department of  
15 Pediatrics, Faculty of Medicine, King Saud University, Riyadh11362, Saudi Arabia  
16 d. Critical Care Department, King Saud University Medical City, King Saud  
17 University, Riyadh11362, Saudi Arabia  
18 e. Department of Psychiatry, College of Medicine, King Saud University Medical City,  
19 King Saud University, Riyadh11362, Saudi Arabia  
20 f. Department of Basic Medical Sciences, College of Medicine, Princess Nourah bint  
21 Abdulrahman University, Riyadh 11564, Saudi Arabia  
22 g. Division of Infectious Diseases, Department of Internal Medicine, King Saud  
23 University Medical City, King Saud University, Riyadh11362, Saudi Arabia  
24 h. Department of Medicine, College of Medicine, Qassim University, Qassim51452,  
25 Saudi Arabia  
26 i. Dr. Sulaiman Al Habib Medical Group, Riyadh11643, Saudi Arabia  
27 j. Sharjah Institute of Medical Research, University of Sharjah, Sharjah27272, United  
28 Arab Emirates  
29 k. Department of Clinical Sciences, College of Medicine, University of Sharjah, Sharjah  
30 27272, United Arab Emirates  
31 l. Department of Family and Community Medicine, King Saud University Medical  
32 City, Riyadh 11362, Saudi Arabia  
33 m. Pediatric nephrology department, Prince Sultan Military Medical City,  
34 Riyadh11159, Saudi Arabia  
35 n. Department of Ob-Gyn, Dr. Abdul Rahman Al Mishari Hospital, Riyadh12241,  
36 Saudi Arabia  
37 o. Department of Ob-Gyn, Dr. Fatina Imran Medical Complex, Doha233, Qatar  
38 p. Division of Infectious Diseases, Faculty of Medicine, University of Ottawa K1H  
39 8M5, Canada  
40 q. King Saud Medical City, Ministry of Health & Alfaisal University, Riyadh11533,  
41 Saudi Arabia  
42 r. Hubert Department of Global Health, Emory University, Atlanta, Georgia30322,  
43 USA  
44 s. Specialty Internal Medicine and Quality Department, Johns Hopkins Aramco  
45 Healthcare, Dhahra34465, Saudi Arabia  
46 t. Infectious Disease Division, Department of Medicine, Indiana University School of  
47 Medicine, Indianapolis, IN46202, USA  
48 u. Infectious Disease Division, Department of Medicine, Johns Hopkins University  
49 School of Medicine, Baltimore, MD21218, USA

51 \*These authors contributed equally to this research.

52 \* Correspondence to:

53 Mohamad-Hani Temsah; [mtemsah@ksu.edu.sa](mailto:mtemsah@ksu.edu.sa) P.O. Box 2925 (Internal Code 34).  
54 Riyadh, 11461; Saudi Arabia  
55 Author emails and ORCID IDs:  
56 Mohamad-Hani Temsah (MHT): PO BOX 2925, Riyadh 11461, Saudi Arabia  
57 [mtemsah@ksu.edu.sa](mailto:mtemsah@ksu.edu.sa) (<https://orcid.org/0000-0002-4389-9322>)  
58 Fadi Aljamaan: PO BOX 2925, Riyadh 11461, Saudi Arabia [faljamaan@ksu.edu.sa](mailto:faljamaan@ksu.edu.sa)  
59 (<https://orcid.org/0000-0001-8404-6652>)  
60 Shuliweeh Alenezi: PO BOX 7747, Riyadh, 13321  
61 [salenizi@ksu.edu.sa](mailto:salenizi@ksu.edu.sa) (<https://orcid.org/0000-0002-7049-0960>)  
62 Khalid Alhasan: PO BOX 2925, Riyadh 11461, Saudi Arabia [kalhasan@ksu.edu.sa](mailto:kalhasan@ksu.edu.sa)  
63 (<https://orcid.org/0000-0002-4291-8536>)  
64 Abdulkarim Alrabiaah [alrabiaah@KSU.EDU.SA](mailto:alrabiaah@KSU.EDU.SA)  
65 Rasha Assiri [raassiri@pnu.edu.sa](mailto:raassiri@pnu.edu.sa) <https://orcid.org/0000-0001-8946-4618>  
66 Rolan Bassrawi [rkbassrawi@ksu.edu.sa](mailto:rkbassrawi@ksu.edu.sa) , <https://orcid.org/0000-0001-7373-1531>  
67 Ali Alhaboob (AAH): PO BOX 2925, Riyadh 11461, Saudi Arabia [drhboob@gmail.com](mailto:drhboob@gmail.com)  
68 (<https://orcid.org/0000-0003-2126-7874>)  
69 Fatimah Alshahrani : [Falshahrani1@ksu.edu.sa](mailto:Falshahrani1@ksu.edu.sa) <https://orcid.org/0000-0002-4646-7488>  
70 Mohamad Alarabi : PO BOX 2925, Riyadh 11461, Saudi Arabia [malarabi@ksu.edu.sa](mailto:malarabi@ksu.edu.sa)  
71 (<https://orcid.org/0000-0001-5439-6109>)  
72 Ali Alaraj (AAA): PO BOX 12471, Riyadh, Saudi Arabia [al\\_araj@hotmail.com](mailto:al_araj@hotmail.com)  
73 (<http://orcid.org/0000-0002-7706-2328>) Naser S Alharbi [nsalharbi@ksu.edu.sa](mailto:nsalharbi@ksu.edu.sa)  
74 Rabih Halwani: [rhalwani@sharjah.ac.ae](mailto:rhalwani@sharjah.ac.ae)  
75 Amr Jamal [amrjamal@ksu.edu.sa](mailto:amrjamal@ksu.edu.sa)  
76 Ayman AL-Eyadhy [aleyadhy@ksu.edu.sa](mailto:aleyadhy@ksu.edu.sa)  
77 Naif Abdulmajeed Dr. [naifq@gmail.com](mailto:naifq@gmail.com)  
78 Lina Alfara [Lalfarra19811@gmail.com](mailto:Lalfarra19811@gmail.com)  
79 Wafa almashdali [Almashdali@gmail.com](mailto:Almashdali@gmail.com)  
80 Fahad Al-Zamil [fzamil@KSU.EDU.SA](mailto:fzamil@KSU.EDU.SA)  
81 Mazin Barry [mbarry@ksu.edu.sa](mailto:mbarry@ksu.edu.sa) (<https://orcid.org/0000-0003-2274-007X>)  
82 Ziad Memish [zmemish@yahoo.com](mailto:zmemish@yahoo.com) <http://orcid.org/0000-0002-5099-0714>  
83 Jaffar A. Al-Tawfiq [jaltawfi@yahoo.com](mailto:jaltawfi@yahoo.com) (<https://orcid.org/0000-0002-5752-2235>)  
84 Sarah Al-Subaie [salsubaie@ksu.edu.sa](mailto:salsubaie@ksu.edu.sa) (ORCID ID: <https://orcid.org/0000-0002-3128-5921>)

85 **Keywords:** COVID-19 vaccine; SARS-CoV-2 Omicron variant; healthcare  
86 workers' perceptions; SARS-CoV-2 variants

---

88 **Abstract:** Background: As the SARS-CoV2 Omicron variant spreads in several  
89 countries, healthcare workers' (HCWs) perceptions and worries regarding  
90 vaccine effectiveness and boosters warrant reassessment.

91 Methods: An online questionnaire among HCWs in Saudi Arabia (KSA) was  
92 distributed from Dec 1<sup>st</sup> to 6<sup>th</sup> 2021 to assess their perceptions, vaccine  
93 advocacy to the Omicron variant, and their perception of the effectiveness of  
94 infection prevention measures and vaccination to prevent its spread, their  
95 Omicron variant related worries in comparison to the other variants, and their  
96 agreement with mandatory vaccination in general for adults.

97 Results: Among the 1285 HCW participants , two-thirds were female, 49.8 %  
98 were nurses, 46.4% were physicians, and 50.0% worked in tertiary care  
99 hospitals. 66.9% considered vaccination to be the most effective way to prevent  
100 the spread of the Omicron variant and future variants. The respondents  
101 however perceived social distancing (78.0%), universal masking (77.8%), and  
102 avoiding unnecessary travel (71.4%) as slightly superior to vaccination to  
103 prevent the spread of SARS-CoV-2 variants. HCWs aging 55 or older agreed  
104 significantly with vaccine ineffectiveness to control Omicron spread, while those  
105 who believed in non-pharmacological infection prevention measures agreed  
106 significantly with vaccination for that purpose. Male HCWs had a significant  
107 agreement with mandatory vaccination of all eligible adult populations. On

108 the other hand, unwilling HCWs to receive the vaccine had strong  
109 disagreements with mandatory vaccination.

110 Conclusions: The current study in the first week of Omicron **showed that** only  
111 two-thirds of HCWs felt that vaccination was the best option to prevent the  
112 spread of the **Omicron** variant, indicating the need for further motivation  
113 campaigns for vaccination and booster dose. HCWs had a strong belief in  
114 **infection prevention measures to contain the spread of SARS-CoV-2**  
115 **variants** that should be encouraged and augmented.

## 116 **1. Introduction:**

117 The B.1.1.529 variant of Severe Acute Respiratory Syndrome Coronavirus 2 (SARS-CoV-2)  
118 was first reported to the World Health Organization (WHO) from South Africa on November 26,  
119 2021 [1]. This emerging variant was named Omicron and designated as a variant of concern  
120 (VOC). This variant has more than 30 mutations on its spike protein. And similar to the Alpha  
121 variant, it is associated with an S-gene target failure on a specific PCR assay due to the presence of  
122 69–70 deletions [2]. Preliminary evidence suggests an increased risk of reinfection with this variant  
123 and high contagiousness [3,4]. The Omicron variant had been reported in 110 countries across all  
124 six WHO regions as of December 22, 2021[5]. [1,2]In addition, the B.1.1.529 variant was thought to  
125 have a higher transmissibility rate than other circulating variants [3,6,7]. More concern has arisen  
126 from the questionable whether current vaccines provide adequate protection against this variant [8].  
127 A recent study showed a 41-fold decline of the geometric mean titer (GMT) inverse of the plasma  
128 dilution required for 50% reduction in infection (FRNT50) with Omicron compared to previous  
129 infection with the wild-type virus, with a three-fold reduction in FRNT50 with the mRNA vaccine  
130 BNT162b2[9]. However, it is likely that previous infection followed by vaccination, or a booster  
131 dose for those completing their primary series, will likely increase neutralization levels that would  
132 confer the needed protection against severe disease from the emerging Omicron variant [10]A  
133 recent study showed that even with Omicron, the rate of hospitalization was highest among  
134 unvaccinated and lowest among those who received a booster dose.88% likelihood to escape  
135 current vaccines[11-13].

136 As new variants emerge, HCWs must continue to serve COVID-19 and non-COVID  
137 patients while still fulfilling personal commitments for their families and themselves[14-16].  
138 Burnout, emotional exhaustion, mental distress, depression and psychological stress have been  
139 linked to HCWs during this pandemic, and research continues to reveal high rates of infection [17].  
140 In addition to patient care, HCWs must keep up with any developments in relation to emerging  
141 variants and their effects on clinical presentation, management, and measures of  
142 prevention—mainly vaccination and infection prevention practices[18,19]. As the Saudi Ministry of  
143 Health announced the first case of Omicron variant on Dec 1<sup>st</sup>, 2021[20], we undertook this study to  
144 assess HCWs' awareness about the SARS-CoV2 Omicron variant, their worry levels in relation to  
145 the different SARS-CoV2 variants, their perception of the effectiveness of the current vaccines, and  
146 other preventive measures to inhibit the spread of the Omicron variant or other future variants, as  
147 well as to assess their agreement with mandatory vaccination of the adult population.

148 **2. Method**

149 **2.1 Data Collection**

150 This was a cross-sectional survey (Appendix 1) carried out among HCWs in Saudi Arabia  
151 (KSA), conducted between Dec 1 and 6, 2021. Participants were invited via a convenience sampling  
152 technique through various healthcare providers' social media platforms, such as WhatsApp,  
153 Twitter, and emails.

154 HCWs were surveyed regarding their Omicron variant awareness, perceptions of the  
155 effectiveness of COVID-19 vaccinations and other measures to prevent its spread and that of other  
156 future variants, and their agreement with mandatory vaccination for all eligible adults. The last part  
157 of the survey focused on HCWs' resilience, anxiety, and coping strategies, which was published as  
158 preprint [21]. The current survey was adopted from our previously published studies, with  
159 modifications related to the new Omicron variant [22-25]. The questionnaire was pilot-validated  
160 and sent through the SurveyMonkey© electronic platform as described previously [22-25].

161 Participants gave consent at the beginning of the survey, were notified about the purpose of  
162 the study, and participated voluntarily in the study. The Institutional Review Board at the College  
163 of Medicine and King Saud University approved the study (approval 21/01039/IRB).

164 **2.2 Statistical analyses**

165 The mean and standard deviation were used to assess continuous variables (worry level for  
166 example), frequency and percentage were used for categorically measured variables (agreement  
167 with mandatory vaccination for example, age was analyzed as categories). The 5-point Likert score  
168 was analyzed by categorical method to assess agreement versus disagreement, the participants'  
169 responses were grouped into two groups: 1. Agree including agree and strongly agree responses; 2.  
170 Disagree including disagree, strongly disagree and neither agree nor disagree responses. A  
171 histogram and the K-S statistical test of normality were used to assess the statistical normality  
172 assumption of the continuous variables, and Levene's test was used to assess the homogeneity of  
173 statistical variance assumption. A multiple-response dichotomies analysis was used to analyze the  
174 multiple response variables (participants' source of information for example). Pearson's correlations  
175 test (r) was used to assess the correlations between metric variables. Multivariate binary logistic  
176 regression analysis was used. The associations were expressed as the odds ratio and 95%  
177 confidence interval. The SPSS IBM statistical analysis program (Version#21. Armonk, NY: IBM  
178 Corp.) was used for the statistical data analysis. The statistical significance level (P-value) was  
179 considered at 0.01 if achieved, and 0.05 if 0.01 not achieved according to the used software.

180 **3. Results:**

181 A total of 1285 HCWs completed the online survey. Table 1 shows the participants' baseline  
182 characteristics. The majority (64%) were female, and 70.9% aged between 25 and 44 years. The  
183 majority were expatriates (62.3%). Regarding their clinical role, 49.8% were nurses and 46.4%  
184 were physicians, of whom 24% were consultants. Fifty percent worked in tertiary institutes, while  
185 two-thirds worked in the outpatient department (OPD) or general wards.

**Table.1: Baseline characteristics of the participating HCWs. N=1285**

| Variable | Frequency | Percentage |
|----------|-----------|------------|
| Sex      |           |            |
| Female   | 822       | 64.0       |

|                                |     |      |
|--------------------------------|-----|------|
| Male                           | 463 | 36.0 |
| <b>Age Group</b>               |     |      |
| 25-34 years                    | 434 | 33.8 |
| 35 to 44 years                 | 477 | 37.1 |
| 45-54 years                    | 273 | 21.2 |
| ≥ 55 years                     | 101 | 7.9  |
| <b>Nationality</b>             |     |      |
| Saudi                          | 484 | 37.7 |
| Expatriate                     | 801 | 62.3 |
| <b>Clinical Role</b>           |     |      |
| Consultant                     | 319 | 24.8 |
| Assistant Consultant/Fellow    | 74  | 5.8  |
| Resident/Registrar             | 203 | 15.8 |
| Nurse                          | 640 | 49.8 |
| Allied Health Practitioner     | 49  | 3.8  |
| <b>Hospital Type</b>           |     |      |
| Primary Healthcare Center      | 338 | 26.3 |
| Secondary Hospital             | 302 | 23.5 |
| Tertiary Hospital              | 645 | 50.2 |
| <b>Hospital Working Area</b>   |     |      |
| Intensive Care Unit (ICU)      | 141 | 11.0 |
| Emergency Room (ER)            | 91  | 7.1  |
| Operating Room (OR)            | 41  | 3.2  |
| COVID-19 Isolation Ward        | 53  | 4.1  |
| General Ward                   | 492 | 38.3 |
| Outpatient Department (OPD)    | 368 | 28.6 |
| Non-Clinical Area              | 99  | 7.7  |
| <b>Geographical Region</b>     |     |      |
| Riyadh City and Central Region | 740 | 57.6 |
| Eastern Province               | 71  | 5.5  |
| Western Province               | 120 | 9.3  |
| Northern Province              | 34  | 2.6  |
| Southern Province              | 320 | 24.9 |

186

187 Almost all (97.9%) of the participants did not recently travel to countries where the  
188 Omicron variant has been recorded. Most (71%) HCWs had not been in contact with COVID-19  
189 patients during the last 3 months, while 22.3% of the HCWs had developed COVID-19 previously.

190 Regarding COVID-19 vaccination, 99.5% had received two doses, and the first dose was  
191 divided equally between AstraZeneca ChAdOx1-S and Pfizer vaccines, and 75% of the second  
192 dose was of the Pfizer–BioNTech COVID-19 vaccine. Regarding the booster dose, 94.1% either

193 received or planned to receive it once eligible, according to time-based criteria of the local  
 194 regulations (Table 2).

**Table.2: Descriptive analysis of the HCWs' experiences of COVID-19 disease, screening and immunization.**

| Variable                                                                                                | Frequency | Percentage |
|---------------------------------------------------------------------------------------------------------|-----------|------------|
| <b>Have you been in contact with COVID-19 patients during the past 3 months?</b>                        |           |            |
| No                                                                                                      | 912       | 71.0       |
| Yes                                                                                                     | 373       | 29.0       |
| <b>Were you previously diagnosed with PCR-positive COVID-19 yourself?</b>                               |           |            |
| No                                                                                                      | 999       | 77.7       |
| Yes                                                                                                     | 286       | 22.3       |
| <b>Did you travel to any country where the Omicron variant has been recorded during the last month?</b> |           |            |
| Yes                                                                                                     | 27        | 2.1        |
| No                                                                                                      | 1258      | 97.9       |
| <b>Which vaccine did you receive for your first COVID-19 vaccine shot?</b>                              |           |            |
| AstraZeneca ChAdOx1-S                                                                                   | 600       | 46.7       |
| Moderna                                                                                                 | 5         | 0.4        |
| Pfizer-BioNTech                                                                                         | 676       | 52.6       |
| Not received                                                                                            | 4         | 0.3        |
| <b>Which vaccine did you receive for your second COVID-19 vaccine shot?</b>                             |           |            |
| AstraZeneca ChAdOx1-S                                                                                   | 296       | 23.0       |
| Moderna                                                                                                 | 20        | 1.6        |
| Pfizer-BioNTech                                                                                         | 963       | 74.9       |
| Not received                                                                                            | 6         | 0.5        |
| <b>Did you receive the third (booster) COVID-19 vaccine?</b>                                            |           |            |
| Yes                                                                                                     | 250       | 19.5       |
| No: not yet eligible for it                                                                             | 566       | 44.0       |
| No: I do not want to receive it                                                                         | 76        | 5.9        |
| No: but I am planning to register for it                                                                | 393       | 30.6       |

195 \* Mean (SD)

196 Table 3 shows the participating HCWs' awareness and knowledge of the available  
 197 literature concerning certain facts and queries related to the Omicron variant (key answers  
 198 displayed in brackets). Almost all (93%) the participating HCWs knew that the Omicron variant  
 199 was first described in South Africa; however, 81.7% believed that the Omicron variant was already  
 200 reported in Saudi Arabia. Of the respondents, 66% knew that Omicron variant is more  
 201 transmissible than the Delta variant, while 26.7% were not sure. The majority (71.8%) did not know  
 202 that the Omicron variant spike protein has 22 mutations. Still, 56.2% expected that Omicron variant  
 203 causes similar signs and symptoms to the original variant. Most (85.1%) of our cohort were aware  
 204 that SARS-CoV-2 mutations are expected, while they were almost equally divided regarding their

205 opinion on whether they were unsure or whether the Omicron variant may/may not cause more  
 206 severe disease compared to previous variants. About half of the participants were unsure if mRNA  
 207 or vector-based vaccines are effective against the Omicron variant. At least two-thirds of them were  
 208 unsure if therapeutics such as monoclonal antibodies used against previous variants might be  
 209 effective against the variant.

210 The mean participants' self-rated familiarity with the Omicron and Delta variants of the  
 211 SARS-CoV-2 virus was 3.24 (SD 0.95) and 3.5 (SD0.99), respectively, with strong and significant  
 212 correlation between these scores  $p < 0.0001$  ( $t = 6.7928$ ,  $df = 2568$ ). When we explored the  
 213 participants' sources of information about the Omicron variant, the MOH and WHO websites were  
 214 the main sources, but social networks were also used to obtain information in equal measure (about  
 215 50%), followed by Official statements (41%), hospital announcements (38%), and the Center of  
 216 Disease Control (CDC) and Saudi CDC websites, which were accessed almost equally (between 30  
 217 and 33%), while scientific journals were lower down on the list (28.7%).

**Table 3: Descriptive analysis of HCWs' awareness and knowledge of the Omicron variant.**

| Variable                                                                                                                                   | True No. (%) | False No. (%) | Neither True/False No. (%) |
|--------------------------------------------------------------------------------------------------------------------------------------------|--------------|---------------|----------------------------|
| The Omicron variant is more transmissible than Delta (True)                                                                                | 848 (66.0%)  | 94 (7.3)      | 343 (26.7)                 |
| "Omicron" is one of the letters of the Greek alphabet (True)                                                                               | 674 (52.5)   | 81 (6.3)      | 530 (41.2)                 |
| The Omicron virus spike protein has 22 mutations (True)                                                                                    | 362 (28.2)   | 211 (16.4)    | 712 (55.4)                 |
| SARS-CoV2 Omicron variant signs and symptoms are the same as the original SARS-CoV-2 variant (False)                                       | 722 (56.2)   | 292 (22.7)    | 271 (21.1)                 |
| SARS-CoV-2 virus mutations are expected (True)                                                                                             | 1094 (85.1)  | 23 (1.8)      | 168 (13.1)                 |
| The Omicron variant causes more severe disease than the original variant (False)                                                           | 493 (38.4)   | 374 (29.1)    | 418 (32.6)                 |
| People who have previously had COVID-19 could become reinfected more easily with Omicron (True)                                            | 480 (37.4)   | 269 (20.9)    | 536 (41.7)                 |
| COVID-19 mRNA vaccines (Pfizer-BioNTech and Moderna) might be less effective against the Omicron variant (not confirmed in the literature) | 376 (29.3)   | 258 (20.1)    | 651 (50.7)                 |
| COVID-19 vector-based vaccines                                                                                                             | 290 (22.6)   | 233           | 762 (59.3)                 |

|                                                                                                                                  |                  |                   |            |
|----------------------------------------------------------------------------------------------------------------------------------|------------------|-------------------|------------|
| (AstraZeneca ChAdOx1-S) might be less effective against the Omicron variant (not confirmed in the literature)                    |                  | (18.1)            |            |
| Therapeutics such as monoclonal antibodies might be less effective against the Omicron variant (not confirmed in the literature) | 251 (19.5)       | 154 (12.0)        | 880 (68.5) |
| <b>Variable</b>                                                                                                                  | <b>Frequency</b> | <b>Percentage</b> |            |
| <b>To the best of your knowledge, where was the SARS-CoV-2 Omicron variant first identified?</b>                                 |                  |                   |            |
| UK                                                                                                                               | 15               | 1.2               |            |
| USA                                                                                                                              | 16               | 1.2               |            |
| South Africa                                                                                                                     | 1197             | 93.2              |            |
| China                                                                                                                            | 47               | 3.7               |            |
| India                                                                                                                            | 10               | 0.8               |            |
| <b>Participants' self-rated familiarity with the Omicron variant *</b>                                                           |                  | 3.24 (0.95)       |            |
| <b>Participants' self-rated familiarity with the Delta variant *</b>                                                             |                  | 3.50 (0.99)       |            |
| <b>Participants' sources of information about the Omicron variant</b>                                                            |                  |                   |            |
| Hospital announcements (e.g., roll-ups or newsletters)                                                                           | 488              | 38.0              |            |
| Official statements or press releases from MOH (e.g., through SMS or newspapers)                                                 | 527              | 41.0              |            |
| MOH website                                                                                                                      | 647              | 50.4              |            |
| WHO website                                                                                                                      | 662              | 51.5              |            |
| CDC website                                                                                                                      | 395              | 30.7              |            |
| Saudi CDC                                                                                                                        | 430              | 33.5              |            |
| Social networks (such as YouTube, Facebook, Twitter, WhatsApp, etc.)                                                             | 633              | 49.3              |            |
| Scientific journals                                                                                                              | 369              | 28.7              |            |
| Other sources                                                                                                                    | 205              | 16.0              |            |

218 \* Mean (SD)

219 Of the participants, 66.9% agreed with the vaccine's effectiveness to prevent the spread of  
220 Omicron or other future variants, while when considering other preventive measures, such as  
221 universal masking, social distancing, and avoiding unnecessary international travel, their  
222 agreement was higher (77.8%, 78%, and 71.4%, respectively). Participating HCWs (82.2%) felt that  
223 the COVID-19 vaccination should be mandatory for all eligible adult populations, while only 5.1%  
224 disagreed (Table 4).



225 Almost half (42.7%) of the HCWs perceived that any of the current mRNA vaccines  
 226 (Pfizer–BioNTech COVID-19 vaccine or Moderna COVID-19 vaccine) would be the best COVID-19  
 227 booster vaccine, while 26.9% felt that a newly developed mRNA vaccine that would better target  
 228 the Omicron variant is best, and 26.2% agreed to receive any of the available vaccines as a third  
 229 booster dose (Table 4).

230 Regarding the participants' perceived risk from the Omicron variant, 16.9% felt that  
 231 patients with immune deficiencies are at the highest risk, followed by the elderly (14.9%), HCWs  
 232 (14.1%), and then patients with chronic medical illnesses (Table 4).

233 When assessing the participants' perceptions about future perspectives of the Omicron  
 234 variant locally and internationally, 57.7% agreed that it has the potential to cause a new COVID-19  
 235 pandemic wave worldwide, while only 45.9% agreed that it may cause another COVID-19 wave in  
 236 Saudi Arabia, and 46.1% agreed that it may cause a lockdown (Table 4). The current cohort of  
 237 HCWs had the highest worry level in relation to international travel (3.19, SD 1.12), followed by the  
 238 Omicron variant (2.18, SD 1.14), and their worry levels in relation to the original SARS-CoV-2 and  
 239 Delta variants were comparable (1.96, SD 1.14 and 1.97 SD, 1.13, respectively), while their worry  
 240 level in relation to the Alpha variant was the lowest (1.67, SD 1.1).

241

**Table 4: Descriptive analysis of the HCWs' beliefs, attitudes, and practices concerning the SARS-CoV2 Omicron variant.**

| Variable                                                                                                                                     | Frequency | Percentage |
|----------------------------------------------------------------------------------------------------------------------------------------------|-----------|------------|
| <b>Vaccines are the most effective way to prevent the spread of the Omicron variant or other future variants</b>                             |           |            |
| Agree                                                                                                                                        | 860       | 66.9       |
| Disagree                                                                                                                                     | 425       | 33.1       |
| <b>Universal masking is still effective in preventing the spread of the Omicron variant or other future variants</b>                         |           |            |
| Agree                                                                                                                                        | 999       | 77.8       |
| Disagree                                                                                                                                     | 286       | 22.2       |
| <b>Social distancing is still effective in preventing the spread of the Omicron variant or other future variants</b>                         |           |            |
| Agree                                                                                                                                        | 1002      | 78.0       |
| Disagree                                                                                                                                     | 283       | 22.0       |
| <b>Avoiding unnecessary international travel is still effective in preventing the spread of the Omicron variant or other future variants</b> |           |            |
| Agree                                                                                                                                        | 917       | 71.4       |
| Disagree                                                                                                                                     | 368       | 28.6       |
| <b>The COVID-19 vaccine should be mandatory for all adult populations</b>                                                                    |           |            |
| Agree                                                                                                                                        | 1056      | 82.2       |
| Disagree                                                                                                                                     | 229       | 17.8       |
| <b>In view of the Omicron variant outbreak, what do you think is the best booster COVID-19 vaccine?</b>                                      |           |            |
| Any of the current mRNA vaccines (Pfizer–BioNTech or Moderna COVID-19)                                                                       | 549       | 42.7       |
| A new mRNA vaccine that is developed to better target the Omicron                                                                            | 346       | 26.9       |

|                                                                                               |      |             |
|-----------------------------------------------------------------------------------------------|------|-------------|
| variant                                                                                       |      |             |
| Another, non-mRNA-type vaccine                                                                | 53   | 4.1         |
| It does not matter; I will be OK with receiving any vaccine as a third booster dose           | 337  | 26.2        |
| <b>Who is at the highest risk from the Omicron variant in your opinion?</b>                   |      |             |
| The elderly                                                                                   | 894  | 14.9        |
| Patients with diabetes                                                                        | 753  | 12.6        |
| Patients with cardiovascular diseases such as hypertension                                    | 703  | 11.7        |
| Patients with chronic renal disease                                                           | 792  | 13.2        |
| Patients with immune deficiency                                                               | 1014 | 16.9        |
| Healthcare workers                                                                            | 846  | 14.1        |
| The obese population                                                                          | 607  | 10.1        |
| The young population                                                                          | 335  | 5.6         |
| Previously unvaccinated people (added from others)                                            | 18   | 0.3         |
| Others                                                                                        | 36   | 0.6         |
| <b>The Omicron variant has the potential to cause a new COVID-19 pandemic wave worldwide.</b> |      |             |
| Agree                                                                                         | 741  | 57.7        |
| Disagree                                                                                      | 544  | 42.3        |
| <b>The Omicron variant may cause another COVID-19 wave in Saudi Arabia.</b>                   |      |             |
| Agree                                                                                         | 590  | 45.9        |
| Disagree                                                                                      | 695  | 54.1        |
| <b>A second national lockdown may be implemented if an Omicron variant outbreak occurs.</b>   |      |             |
| Agree                                                                                         | 593  | 46.2        |
| Disagree                                                                                      | 692  | 53.8        |
| <b>Using a Likert rating from 1-5, how worried are you by</b>                                 |      |             |
| International travel *                                                                        |      | 3.19 (1.12) |
| The original variant that started the first pandemic *                                        |      | 1.96 (1.14) |
| The Alpha variant (which was first described in the UK) *                                     |      | 1.67 (1.1)  |
| The Delta variant (which was first described in India) *                                      |      | 1.97 (1.13) |
| The new Omicron variant *                                                                     |      | 2.18 (1.14) |

242 \* Mean (SD)

243

244 **HCWs' perceptions of vaccination and other preventive measures to prevent the spread of**  
245 **SARS-CoV-2 variants**

246 The HCWs' belief in universal masking, social distancing, and avoiding unnecessary  
247 international flights to prevent the spread of SARS-CoV-2 variants correlated strongly and  
248 significantly with their belief that vaccines are still the most effective way to prevent the spread of  
249 Omicron and other future variants ( $r = 0.707, 0.675, 0.603$ , respectively;  $p < 0.01$ ). Their mean worry  
250 level in relation to international travel also correlated significantly with the above measures ( $r =$

251 0.102, 0.134, 0.157, respectively;  $p < 0.01$ ), which also correlated with their agreement with COVID-19  
 252 vaccine mandates for all adults ( $r = 0.139$ ,  $p < 0.01$ ). Their mean worry level in relation to the  
 253 Omicron variant correlated significantly and strongly with their perception of the effectiveness of  
 254 the above preventive measures, including vaccination to prevent its spread and mandatory  
 255 vaccination ( $r = 0.082, 0.103, 0.132, 0.160, 0.114$ , respectively;  $p < 0.01$ ). Self-rated familiarity with the  
 256 Omicron or Delta variants correlated strongly and significantly only with their agreement of  
 257 universal masking as a preventive measure to prevent the spread of other variants, including  
 258 Omicron, ( $r = 0.090, 0.094$ , respectively;  $p < 0.01$ ). Additionally, their familiarity with either variant  
 259 correlated significantly with their agreement with mandatory vaccination ( $r = 0.167, 0.142$ ,  
 260 respectively;  $p < 0.01$ ) (Table 5).

261

**Table 5: Correlation between participants' perceptions about vaccines, universal masking and social distancing to prevent the spread of the Omicron variant.**

| Variable                                                     | Vaccines effectiveness <sup>a</sup> | Universal masking effectiveness <sup>b</sup> | Social distancing effectiveness <sup>c</sup> | COVID-19 vaccine mandate <sup>k</sup> |
|--------------------------------------------------------------|-------------------------------------|----------------------------------------------|----------------------------------------------|---------------------------------------|
| Universal masking <sup>d</sup>                               | .707**                              |                                              |                                              |                                       |
| Social distancing effectiveness <sup>e</sup>                 | .675**                              | .889**                                       |                                              |                                       |
| Avoiding unnecessary international travel <sup>f</sup>       | .603**                              | .755**                                       | .794**                                       |                                       |
| Omicron variant potential/new COVID-19 pandemic <sup>g</sup> | -.002                               | .011                                         | .017                                         |                                       |
| Omicron variant potential/COVID-19 wave <sup>h</sup>         | .005                                | -.015                                        | .000                                         |                                       |
| Omicron variant potential/lockdown <sup>i</sup>              | .010                                | .027                                         | .051                                         |                                       |
| COVID-19 vaccine mandate <sup>k</sup>                        | .179**                              | .117**                                       | .113**                                       |                                       |
| Mean worry level in relation to international travel         | .102**                              | .134**                                       | .157**                                       |                                       |
| Mean worry level in relation to original variant             | .069*                               | .091**                                       | .111**                                       | .139**                                |
| Mean worry level in                                          | .065*                               | .075**                                       | .098**                                       | .148**                                |

|                                                                   |        |        |        |        |
|-------------------------------------------------------------------|--------|--------|--------|--------|
| relation to Alpha variant                                         |        |        |        |        |
| Mean in relation to level from Delta variant                      | .069*  | .109** | .124** | .114** |
| Participants' mean worry level in relation to the Omicron variant | .082** | .103** | .132** | .114** |
| Self-rated familiarity with Omicron variant                       | .090*  | .055*  | .069*  | .167** |
| Self-rated familiarity with the Delta variant                     | .094** | .062*  | .066*  | .142** |

262 a Vaccines are still the most effective way to prevent the spread of Omicron and other future  
263 variants. b Universal masking is still effective in preventing variant spread. c Social distancing is  
264 still effective in preventing variant spread. d Participants' agreement level with universal masking  
265 still being effective in preventing the spread of SARS-CoV-2 variants. e Participants' agreement level  
266 with the effectiveness of social distancing to prevent the spread of SARS-CoV-2 variants. f  
267 Participants' agreement level with the effectiveness of avoiding unnecessary international travel to  
268 prevent the spread of SARS-CoV-2 variants. g Participants' agreement level with the potential of the  
269 Omicron variant to cause a new COVID-19 pandemic wave worldwide. h Participants' agreement  
270 level with the potential of the Omicron variant to cause another COVID-19 wave in Saudi Arabia. i  
271 Participants' agreement level with the potential of the Omicron variant to cause second lockdown. k  
272 Participants' agreement level with COVID-19 vaccine mandates.

273 \*\*. Correlation is significant at the 0.01 level (2-tailed). \* Correlation is significant at the 0.05 level  
274 (2-tailed). Note: Correlation (r) coefficients <0.10 are considered non-significant or are weak even if  
275 their p values are <0.050.

276

277 Multivariate logistic regression analysis of multi-variables related to the HCWs and their  
278 perception of the ineffectiveness of the currently available COVID-19 vaccines to prevent the spread  
279 of SARS-CoV-2 variants found that the HCWs' age correlated positively with their agreement with  
280 the ineffectiveness of the COVID-19 vaccines when they were aged over 35 years (OR = 1.25, p =  
281 0.235), and significantly when they were aged 55 and above (OR = 1.96, p = 0.034) (Figure 1) (Table  
282 6). HCWs who strongly believed that universal masking and avoiding unnecessary international  
283 flights are still effective ways to prevent the spread of mutant variants were in significant  
284 disagreement with the ineffectiveness of the vaccines to prevent the spread of current and future  
285 mutant variants.

286 In addition, those who believed that COVID-19 vaccination should be mandatory for all  
 287 adults or believed that mutant variants are an expected phenomenon also showed strong  
 288 disagreement with the ineffectiveness of the vaccines. HCWs who worked in critical care areas  
 289 showed significant agreement with the belief that the COVID-19 vaccines are ineffective in  
 290 preventing the spread of mutant variants. Regarding the HCWs' sources of information, those who  
 291 significantly relied on the WHO did not believe in the efficacy of the vaccines to prevent the spread  
 292 of current or future mutant variants (Table 6).

293

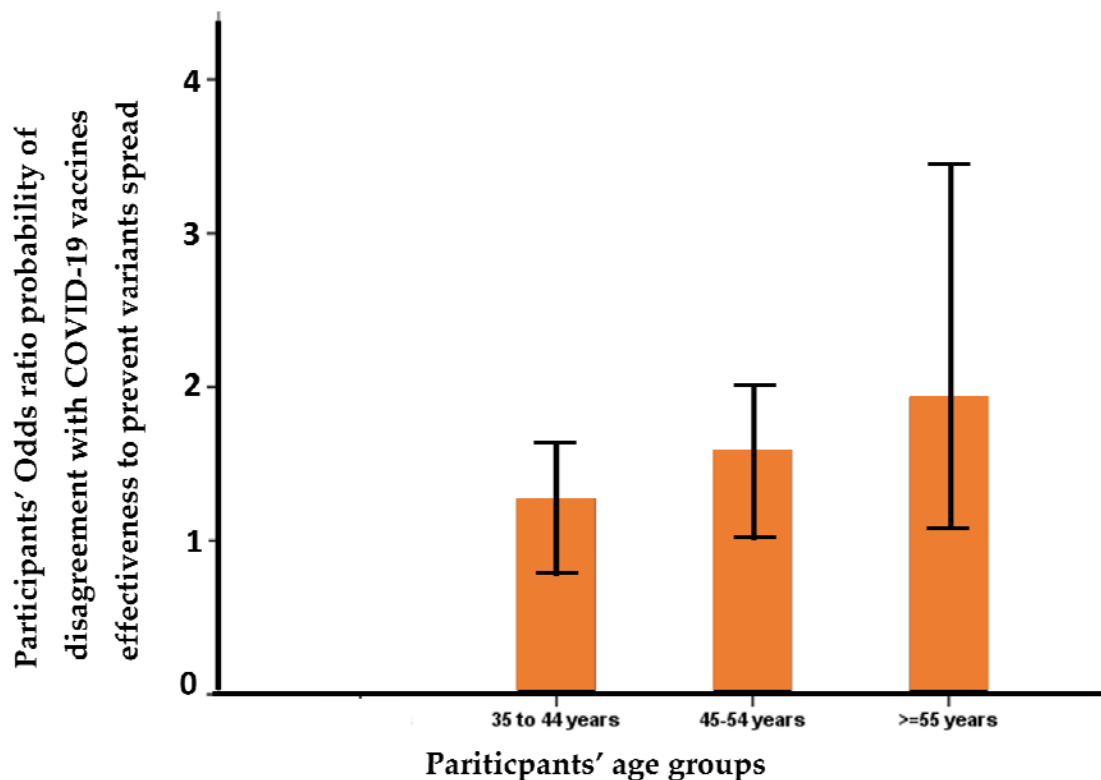

294

295 Figure 1: Odds ratio between the participants' ages and their agreement with the  
 296 ineffectiveness of the COVID-19 vaccines to prevent the spread of mutant variants; the  
 297 correlation is significant for those over 55 years old;  $p = 0.034$ .

298 Table 6: Multivariate logistic regression analysis of odds of agreement with the ineffectiveness  
 299 of the COVID-19 vaccines to prevent the spread of mutant variants, especially Omicron.

| Variable  | Multivariate adjusted odds ratio | 95% C.I. for OR |       | p value |
|-----------|----------------------------------|-----------------|-------|---------|
|           |                                  | Lower           | Upper |         |
| Sex =male | .857                             | .609            | 1.208 | 0.379   |

|                                                                                                            |       |       |       |        |
|------------------------------------------------------------------------------------------------------------|-------|-------|-------|--------|
|                                                                                                            |       |       |       |        |
| Age =35 to 44 years                                                                                        | 1.255 | .863  | 1.827 | 0.235  |
| Age =45-54 years                                                                                           | 1.502 | .967  | 2.332 | 0.070  |
| Age >=55 years                                                                                             | 1.965 | 1.054 | 3.663 | 0.034  |
| Work area =ICU                                                                                             | 1.925 | 1.194 | 3.103 | 0.007  |
| Work area = OR                                                                                             | 2.148 | .878  | 5.255 | 0.094  |
| Previously diagnosed with COVID-19                                                                         | 1.292 | .897  | 1.863 | 0.169  |
| Does not want to take the COVID-19 vaccine                                                                 | 1.564 | .833  | 2.937 | 0.164  |
| Believes SARS-CoV-2 variants are expected                                                                  | .799  | .638  | 1.000 | 0.050  |
| Believes universal masking is still effective at preventing the spread of variants                         | .318  | .258  | .393  | <0.001 |
| Believes avoiding unnecessary international travel is still effective at preventing the spread of variants | .617  | .499  | .763  | <0.001 |
| Agreement level that the Omicron variant has the potential to cause a new COVID-19 pandemic wave worldwide | 1.208 | .934  | 1.562 | 0.149  |
| Agreement level that COVID-19 vaccination should be mandatory for all adults                               | .355  | .263  | .478  | <0.001 |
| Source of info: MOH website                                                                                | .760  | .544  | 1.062 | 0.108  |
| Source of info: WHO website                                                                                | 1.474 | 1.046 | 2.077 | 0.027  |
| Source of info: CDC website                                                                                | .768  | .521  | 1.133 | 0.183  |
| Source of info: Scientific journals                                                                        | .774  | .526  | 1.137 | 0.191  |
| Worry level in relation to the Delta variant                                                               | 1.127 | .971  | 1.307 | 0.117  |

Dependent variable: COVID-19 vaccine ineffectiveness to prevent the spread of mutant variants, especially Omicron.

300 An analysis of the characteristics of the surveyed HCWs found that males (compared to  
 301 females) were in significant agreement with mandatory vaccination of all eligible adults, while age  
 302 did not correlate with agreement with mandatory vaccination. HCWs who relied on social media as  
 303 a source of information were in significant agreement with mandatory vaccination for all adults,  
 304 self-rated familiarity level with the Omicron variant and the agreement that there could be further  
 305 national lockdowns due to the Omicron variant. Furthermore, the level of agreement with the  
 306 effectiveness of vaccines to prevent the spread of mutant variants correlated significantly with  
 307 agreement with mandatory vaccination.

308 Those who were absolutely unwilling to receive the vaccine were five times more likely to  
 309 disagree with mandatory vaccination, while those who agreed with the effectiveness of unnecessary  
 310 travel avoidance to prevent the spread of mutant variants were 1.5 times more likely to disagree  
 311 with the mandatory vaccination of all eligible adults (Table 7).

312 **Table 7: Multivariate logistic regression analysis of odds of disagreement with mandatory**  
 313 **COVID-19 vaccination.**

| Variable                                                                                        | Multivariate adjusted odds ratio | 95% C.I. for OR |       | p value |
|-------------------------------------------------------------------------------------------------|----------------------------------|-----------------|-------|---------|
|                                                                                                 |                                  | Lower           | Upper |         |
| Sex = male                                                                                      | .692                             | .487            | .983  | .040    |
| Age group                                                                                       | .865                             | .723            | 1.035 | .113    |
| Nationality = expatriate                                                                        | .295                             | .209            | .416  | <0.001  |
| Absolute unwillingness to receive vaccines                                                      | 5.661                            | 3.303           | 9.704 | <0.001  |
| Reliance on social media as source of information                                               | .614                             | .438            | .860  | .005    |
| Reliance on MOH official statements as source of information                                    | 1.278                            | .914            | 1.788 | .152    |
| Self-rated familiarity level with Omicron variant                                               | .754                             | .637            | .893  | .001    |
| Agreement level with the effectiveness of vaccines to prevent the spread of variants            | .525                             | .428            | .644  | <0.001  |
| Agreement level with the effectiveness of unnecessary travel avoidance to prevent the spread of | 1.438                            | 1.188           | 1.740 | <0.001  |

|                                                                                               |      |      |      |        |
|-----------------------------------------------------------------------------------------------|------|------|------|--------|
| variants                                                                                      |      |      |      |        |
| Agreement level with the possibility of a second national lockdown due to the Omicron variant | .580 | .472 | .714 | <0.001 |

Dependent variable: disagreement with mandatory COVID-19 vaccination.

314

315

316 **Discussion**

317 This study explored HCWs' perceptions and awareness of the SARS-CoV-2 Omicron variant  
318 after the initial WHO alert, in addition to their agreement with vaccine effectiveness to prevent its  
319 spread or other potential future variants. Most (64%) respondents were female, similar to a  
320 previous study about Delta variant concerns in KSA. This was also in agreement with other studies  
321 showing that the majority of HCWs are female [25-27].

322 One-fifth of study participants received a booster dose, while the majority reported plans to  
323 receive it once they became eligible, with a small percentage (6%) not planning to receive it. The  
324 majority (69.6%) in our study chose to receive the booster dose with any of the currently available  
325 mRNA vaccines or newly developed ones; this observation mirrors another study conducted in a  
326 neighboring country among HCWs, where they also preferred mRNA vaccines[28]. Such behavior  
327 could be partly due to the hematological side effects that have been recorded with the viral vector  
328 vaccines [28]. In addition, this could signal vaccine selectivity (VS), which is currently an emerging  
329 public health challenge due to the multiplicity of vaccine options. Another explanation is vaccine  
330 hesitancy (VH), which could be related to reliance on social media as the main source of  
331 information, which was reported by almost half of the participants, as opposed to less than  
332 one-third who reported utilizing scientific journals as a main source of information; therefore,  
333 increased access to peer-reviewed journals should be strongly encouraged among HCWs[25].  
334 Keeping in mind the double edge sword effects the social media plays on individuals' decision  
335 making, as social media spreads information that's not scientifically always verified, puts their  
336 personal touch or psycho-cognitive flavor that drives the audience, therefore our observation of  
337 social media being highly used source of information by the surveyed HCWs can explain some  
338 observations like (VS), (VH) and HCWs significant agreement with mandatory vaccination for all  
339 adults. Such agreement might be a reflection of their self-rated familiarity level with the Omicron  
340 variant (stemming from the information they acquired from social media) that also correlated  
341 significantly with their agreement with mandatory vaccination. Social media spread with the  
342 emergence of the Omicron variant a huge load of information that was potentially driving all  
343 sectors of the society to abide with all the measures of protection including vaccination, from  
344 SARS-CoV-2 including its new Omicron variant.

345



346 The primary concerns regarding Omicron are whether it is more contagious, more virulent, or  
347 both, in comparison to other variants, and how likely it would be to evade natural (post previous  
348 COVID-19 infection) and vaccine-induced immunity [11,29-31]. However, with more than 30  
349 mutations and some deletions that are similar to other variants, increased transmissibility and  
350 higher antibody escape were expected [32]. However, with few clinical and epidemiological data to  
351 help define the true threat of Omicron, participants' mixed knowledge responses are expected, as  
352 has been observed in our study, in which they even extended to their belief in the effectiveness of  
353 the vaccines to control its spread [33]

354 Among our study participants, regarding the perceived effectiveness of various methods to  
355 control the spread of the Omicron variant, social distancing and universal masking scored the  
356 highest, followed by avoiding international flights and, lastly, vaccination. Again, such  
357 observations shed light on their questioning of the vaccine's effectiveness against Omicron due to  
358 its many mutations, especially involving the spike protein. Their perceived effectiveness of the  
359 current COVID-19 vaccines against the Omicron variant was 67%. This represents a decline in  
360 HCWs' perception of vaccine efficacy compared to our earlier study, performed in December 2020  
361 during the initial rollout of the COVID-19 vaccines, which was 80.2% [34]. Such findings reflect  
362 declining confidence in vaccine efficacy against emerging variants, which is noteworthy since their  
363 concerns about efficacy have been stated as one of the main reasons for vaccine hesitancy [35].  
364 COVID-19 vaccine-related uncertainty and challenges persist in the face of combating emerging  
365 SARS-CoV-2 variants. Immune escape is a real concern with the Omicron variant. According to  
366 findings from South Africa, the efficacy of the Pfizer-BioNTech vaccine against the Omicron variant  
367 was significantly reduced, with a 41-fold lower level of neutralizing antibodies when compared to  
368 the wild-type variant of SARS-CoV-2 [10].

369  
370 The fact that 82.2% of HCWs agree with mandatory COVID-19 vaccination for all adults is an  
371 interesting finding. Mandating immunizations for HCWs or other business employees is not only  
372 ethical, but also legal. Employers have the right to require vaccination as a condition of  
373 employment, as the Equal Employment Opportunity Commission and courts have stated [36] and a  
374 multi-society statement on COVID-19 vaccination had been also released [37]. This right applies to  
375 both vaccinations approved for emergency use and those that have been fully approved by the FDA.  
376 Mandates, however, can erode public support, causing a backlash and even lowering vaccine  
377 uptake. There are no established processes to enforce population-wide vaccination obligations in  
378 most countries, despite the fact that employers, healthcare providers, and educational institutions  
379 can monitor compliance with mandates. Requiring COVID-19 immunizations for HCWs, for  
380 example, is not a new practice; rather, it is a continuation of a long-standing policy. Vaccination  
381 against influenza, hepatitis B, and other infectious diseases has long been mandatory in many  
382 health-care settings [38]. Whether to mandate COVID-19 vaccination for HCWs and/or all  
383 employees and how to implement such a policy is ultimately a local authority decision. For instance,  
384 the local authorities in both New York and California announced a vaccine mandate for state  
385 employees [39].

386  
387 We observed that HCWs' beliefs in infection control measures that have been mandated and  
388 optimized during the COVID-19 pandemic namely, universal masking, social distancing, and  
389 vaccination as preventive methods for the spread of the Omicron variant or other future variants  
390 [40,41] all correlated positively and significantly with their belief in mandatory vaccination for all

391 eligible adults. They still believed that avoiding unnecessary international travel is an effective  
392 measure in preventing the spread of SARS-CoV-2 variants, even after widespread vaccination,  
393 perhaps due to the emergence of at least three variants, one of them with high transmissibility and  
394 serious clinical morbidity and high mortality (the Delta variant). However, there is a huge  
395 consequence of travel ban and lockdown with any emerging variant[42,43].

396 HCWs who believed that SARS-CoV-2 mutations are expected and will reoccur were  
397 significantly less in agreement with the belief that the vaccines are ineffective against the spread of  
398 the Omicron variant or other potential future variants, which is an expected and healthy belief, as  
399 the best preventive measure to contain the pandemic at present is widespread vaccination This has  
400 been observed in HCWs' stringent behavior of abiding by the infection prevention measures, such  
401 as universal masking and social distancing, for the same purpose [40,41], which has also been  
402 observed in our results, in which agreement with the effectiveness of vaccination to prevent the  
403 spread of mutant variants is significantly and positively associated with agreement with mandatory  
404 vaccination.

405

406 HCWs in critical care areas believed significantly in the ineffectiveness of the vaccines to prevent  
407 the spread of mutant variants, including Omicron. This might be explained by the multiple  
408 mutations that the Omicron variant has and the critical care workers' anxiety regarding the current  
409 vaccine's efficacy against it, being frontliners exposed to severe cases. In the same vein, we  
410 observed that HCWs who relied on the WHO as a main source of information disagreed with the  
411 vaccine's effectiveness to prevent the spread of the mutant strains, including Omicron, as it is a  
412 scientific source that releases only evidence-based information, which has not thus far proven the  
413 vaccine's efficacy in that regard.

414 Male gender was significantly associated with agreement with mandatory vaccination of all  
415 eligible adults. This attitude has been observed in multiple studies, as males were more inclined  
416 toward vaccine uptake and had much less vaccine hesitancy, while age did not correlate with  
417 mandatory vaccination agreement [28,44].

418 The level of agreement with the effectiveness of vaccines to prevent the spread of mutant  
419 variants was significantly associated with agreement with mandatory vaccination, and the same  
420 was observed with the level of agreement with the belief that there might be a second national  
421 lockdown due to the Omicron variant. This behavior from HCWs—of stringent abidance with  
422 vaccination—correlates with their expectation of its effectiveness to prevent the spread of any  
423 mutant variant, and their fear of a national lockdown, not unexpectedly, drove them to have an  
424 unwavering belief in mandatory vaccination as the best modality to prevent it. However, they did  
425 not perceive the effectiveness of unnecessary travel avoidance to be effective in preventing the  
426 spread of mutant variants or being superior to mandatory vaccination. Early lockdown and social  
427 distancing in the initial phase of the pandemic were useful in slowing the spread of SARS-CoV-2 in  
428 Saudi Arabia[45]. In addition, during the peak of the initial lockdown the level of anxiety was  
429 associated with being with family members at risk of SARS-CoV-2 infection. Thus, it is  
430 understandable that HCWs fear the occurrence of second lockdown with the emergence of the  
431 Omicron variant[46].

### 3.1 Study limitations and strengths

While this research is subject to the limitations of cross-sectional studies, such as sampling, response rate, and uneven geographical representation, the fact that we carried out the study early on in the spread of the Omicron variant also limited our ability to assess the awareness of the HCWs in relation to the variant, especially given the scarce scientific data available after it was first identified. Despite this, the scientific evidence regarding the current vaccines' effectiveness against the Omicron variant will take a significant amount of time to materialize. As with the evolving situation in regard to variants, HCWs' experiences and perceptions are also likely to change. Moreover, HCWs' experiences may differ from one setting to another.

### 4. Conclusion

This is the first national survey in Saudi Arabia that was conducted in the first week of the WHO Omicron variant announcement, to address HCWs' awareness of the variant, acceptance of vaccine booster doses and agreement with vaccination to prevent the spread of SARS-CoV-2 Omicron variant or future variants. Only about two-thirds of HCWs perceived that vaccination is the best option to prevent the spread of the Omicron variant, indicating the need for future studies to explore the performance of currently available vaccines in terms of the protection they offer against the current variants. At the same time, the HCWs had a strong belief in preventive measures, such as universal masking and social distancing, to prevent the spread of Omicron or future variants, which should still be maintained in practice, at least in healthcare institutions, to prevent nosocomial spread until further evidence can be elucidated.

Abbreviations:

**CDC:** Center for Disease Control and Prevention

**COVID-19:** Coronavirus disease 2019

**SARS-CoV-2:** Severe acute respiratory syndrome coronavirus 2

**WHO:** World Health Organization

Conflicts of interest: None declared.

**Ethics approval and consent to participate:** The study was approved by the institutional review board of King Saud University (approval 21/01039/IRB).

**Acknowledgments:** This research has been financially supported by Prince Abdullah Ben Khalid Celiac Disease Research Chair, under the Vice Deanship of Research Chairs, King Saud University, Riyadh, Kingdom of Saudi Arabia. The research team is thankful for the statistical data analysis consultation offered by [www.hodhoddata.com](http://www.hodhoddata.com).

**Author contributions:** M.H.T., S. Alenezi, M.A., F.A., K.A., F.A., S. Al-Subaie, M.B., Z.M., and J.A. conceptualized the study, analyzed the data, and wrote the manuscript. R.A., R.B., F.A., A. Arabiaah, A. Alhaboob, A. Alaraj, N.S.A., R.H., L.A., N.A., A.J., A. Aleyadhy, and W.A. contributed to the study design; collected, analyzed, interpreted data; and edited the manuscript.

All authors reviewed and approved the final version of the manuscript.

### References

1. World Health Organization, Classification of Omicron (B. 1.1. 529): SARS-CoV-2 variant of concern. *November 2021*, 26, 2021.

- 473 2. Volz, E.; Mishra, S.; Chand, M.; Barrett, J.C.; Johnson, R.; Geidelberg, L.; Hinsley, W.R.;  
474 Laydon, D.J.; Dabrera, G.; O'Toole, Á.; et al. Assessing transmissibility of SARS-CoV-2  
475 lineage B.1.1.7 in England. *Nature* **2021**, *593*, 266-269, doi:10.1038/s41586-021-03470-x.
- 476 3. Chen, J.; Wang, R.; Gilby, N.B.; Wei, G.-W. Omicron Variant (B.1.1.529): Infectivity, Vaccine  
477 Breakthrough, and Antibody Resistance. *Journal of Chemical Information and Modeling* **2022**,  
478 *62*, 412-422, doi:10.1021/acs.jcim.1c01451.
- 479 4. Al-Tawfiq, J.A.; Hoang, V.T.; Le Bui, N.; Chu, D.T.; Memish, Z.A. The Emergence of the  
480 Omicron (B.1.1.529) SARS-CoV-2 Variant: What is the Impact on the Continued Pandemic?  
481 In *J Epidemiol Glob Health*; 2022; pp. 1-4.
- 482 5. WHO. Enhancing Readiness for Omicron (B.1.1.529): Technical Brief and Priority Actions for  
483 Member States. Available online:  
484 [https://www.who.int/publications/m/item/enhancing-readiness-for-omicron-\(b.1.1.529\)-tech-](https://www.who.int/publications/m/item/enhancing-readiness-for-omicron-(b.1.1.529)-technical-brief-and-priority-actions-for-member-states)  
485 [nical-brief-and-priority-actions-for-member-states](https://www.who.int/publications/m/item/enhancing-readiness-for-omicron-(b.1.1.529)-technical-brief-and-priority-actions-for-member-states) (accessed on 25 Dec 2021).
- 486 6. Ren, S.Y.; Wang, W.B.; Gao, R.D.; Zhou, A.M. Omicron variant (B.1.1.529) of SARS-CoV-2:  
487 Mutation, infectivity, transmission, and vaccine resistance. *World J Clin Cases* **2022**, *10*, 1-11,  
488 doi:10.12998/wjcc.v10.i1.1.
- 489 7. Yang, W.; Shaman, J. SARS-CoV-2 transmission dynamics in South Africa and  
490 epidemiological characteristics of the Omicron variant. *medRxiv* **2021**,  
491 doi:10.1101/2021.12.19.21268073.
- 492 8. TheGuardians. Omicron: everything you need to know about new Covid variant. Available  
493 online:  
494 [https://www.theguardian.com/world/2021/nov/26/vaccine-resistant-what-scientists-know-n-](https://www.theguardian.com/world/2021/nov/26/vaccine-resistant-what-scientists-know-new-covid-variant)  
495 [ew-covid-variant](https://www.theguardian.com/world/2021/nov/26/vaccine-resistant-what-scientists-know-new-covid-variant) (accessed on 18 Dec 2021).
- 496 9. Torjesen, I. Covid-19: Omicron may be more transmissible than other variants and partly  
497 resistant to existing vaccines, scientists fear. *Bmj* **2021**, *375*, n2943, doi:10.1136/bmj.n2943.
- 498 10. Cele, S.; Jackson, L.; Khan, K.; Khoury, D.S.; Moyo-Gwete, T.; Tegally, H.; Scheepers, C.;  
499 Amoako, D.; Karim, F.; Bernstein, M.; et al. SARS-CoV-2 Omicron has extensive but  
500 incomplete escape of Pfizer BNT162b2 elicited neutralization and requires ACE2 for  
501 infection. *medRxiv* **2021**, doi:10.1101/2021.12.08.21267417.
- 502 11. Chen, J.; Wang, R.; Gilby, N.B.; Wei, G.W. Omicron Variant (B.1.1.529): Infectivity, Vaccine  
503 Breakthrough, and Antibody Resistance. *J Chem Inf Model* **2022**, *62*, 412-422,  
504 doi:10.1021/acs.jcim.1c01451.
- 505 12. Garcia-Beltran, W.F.; St Denis, K.J.; Hoelzemer, A.; Lam, E.C.; Nitido, A.D.; Sheehan, M.L.;  
506 Berrios, C.; Ofoman, O.; Chang, C.C.; Hauser, B.M.; et al. mRNA-based COVID-19 vaccine  
507 boosters induce neutralizing immunity against SARS-CoV-2 Omicron variant. *Cell* **2022**, *185*,  
508 457-466.e454, doi:10.1016/j.cell.2021.12.033.
- 509 13. Danza, P.; Koo, T.H.; Haddix, M.; Fisher, R.; Traub, E.; K, O.Y.; Balter, S. SARS-CoV-2  
510 Infection and Hospitalization Among Adults Aged  $\geq 18$  Years, by Vaccination Status, Before  
511 and During SARS-CoV-2 B.1.1.529 (Omicron) Variant Predominance - Los Angeles County,  
512 California, November 7, 2021-January 8, 2022. *MMWR Morb Mortal Wkly Rep* **2022**, *71*,  
513 177-181, doi:10.15585/mmwr.mm7105e1.

- 514 14. Al-Tawfiq, J.A.; Al-Yami, S.S.; Rigamonti, D. Changes in healthcare managing COVID and  
515 non-COVID-19 patients during the pandemic: striking the balance. *Diagn Microbiol Infect Dis*  
516 **2020**, *98*, 115147, doi:10.1016/j.diagmicrobio.2020.115147.
- 517 15. Rigamonti, D.; Leonardi, R.; Al-Tawfiq, J.A. Coronavirus Disease Mortality: Understanding  
518 Regional Differences. *Erciyes Medical Journal* **2022**, 3-7.
- 519 16. Temsah, M.H.; Al Huzaimi, A.; Alrabiaah, A.; Alamro, N.; Al-Sohime, F.; Al-Eyadhy, A.;  
520 Alhasan, K.; Kari, J.A.; Alhaboob, A.; Alsalmi, A.; et al. Changes in healthcare workers'  
521 knowledge, attitudes, practices, and stress during the COVID-19 pandemic. *Medicine*  
522 (*Baltimore*) **2021**, *100*, e25825, doi:10.1097/md.00000000000025825.
- 523 17. Lasalvia, A.; Bodini, L.; Amaddeo, F.; Porru, S.; Carta, A.; Poli, R.; Bonetto, C. The Sustained  
524 Psychological Impact of the COVID-19 Pandemic on Health Care Workers One Year after  
525 the Outbreak-A Repeated Cross-Sectional Survey in a Tertiary Hospital of North-East Italy.  
526 *Int J Environ Res Public Health* **2021**, *18*, doi:10.3390/ijerph182413374.
- 527 18. Mohapatra, R.K.; Tiwari, R.; Sarangi, A.K.; Islam, D.R.; Chakraborty, C.; Dhama, K.  
528 COMMENTARYOmicron (B.1.1.529) variant of SARS-CoV-2- Concerns, challenges and  
529 recent updates. *J Med Virol* **2022**, doi:10.1002/jmv.27633.
- 530 19. Khandia, R.; Singhal, S.; Alqahtani, T.; Kamal, M.A.; El-Shall, N.A.; Nainu, F.; Desingu, P.A.;  
531 Dhama, K. Emergence of SARS-CoV-2 Omicron (B.1.1.529) variant, salient features, high  
532 global health concerns and strategies to counter it amid ongoing COVID-19 pandemic.  
533 *Environ Res* **2022**, *209*, 112816, doi:10.1016/j.envres.2022.112816.
- 534 20. SPA. Health Ministry: Detecting Omicron Variant Case of Coronavirus in Saudi Arabia for  
535 Citizen Coming Back from North African Country. Available online:  
536 [www.spa.gov.sa/2308747](http://www.spa.gov.sa/2308747) (accessed on
- 537 21. Temsah, M.-H.; Alenezi, S.; Alarabi, M.; Aljamaan, F.; Alhasan, K.; Assiri, R.; Bassrawi, R.;  
538 Alshahrani, F.; Alhaboob, A.; Alaraj, A.; Alharbi, N.S.; Alrabiaah, A.; Halwani, R.; Jamal, A.;  
539 Abdulmajeed, N.; Alfarra, L.; Almashdali, W.; Al-Eyadhy, A.; AlZamil, F.; Alsubaie, S.;  
540 Barry, M.; Memish, Z.A.; Al-Tawfiq, J.A. Healthcare Workers' SARS-CoV-2 Omicron Variant  
541 Uncertainty-Related Stress, Resilience, and Coping Strategies during the First Week of the  
542 World Health Organization's Alert. *Int. J. Environ. Res. Public Health* **2022**, *19*, 1944.  
543 <https://doi.org/10.3390/ijerph19041944>
- 544 22. Temsah, M.H.; Alhuzaimi, A.N.; Alamro, N.; Alrabiaah, A.; Al-Sohime, F.; Alhasan, K.; Kari,  
545 J.A.; Almaghlouth, I.; Aljamaan, F.; Al Amri, M.; et al. Knowledge, Attitudes, and Practices  
546 of Healthcare Workers During the Early COVID-19 Pandemic in a Main, Academic Tertiary  
547 Care Centre in Saudi Arabia. *Epidemiol Infect* **2020**, 1-29, doi:10.1017/S0950268820001958.
- 548 23. Temsah, M.H.; Al-Sohime, F.; Alamro, N.; Al-Eyadhy, A.; Al-Hasan, K.; Jamal, A.;  
549 Al-Maglouth, I.; Aljamaan, F.; Al Amri, M.; Barry, M.; et al. The psychological impact of  
550 COVID-19 pandemic on health care workers in a MERS-CoV endemic country. *J Infect Public*  
551 *Health* **2020**, *13*, 877-882, doi:10.1016/j.jiph.2020.05.021.
- 552 24. Barry, M.; Temsah, M.H.; Aljamaan, F.; Saddik, B.; Al-Eyadhy, A.; Alenezi, S.; Alamro, N.;  
553 Alhuzaimi, A.N.; Alhaboob, A.; Alhasan, K.; et al. COVID-19 vaccine uptake among  
554 healthcare workers in the fourth country to authorize BNT162b2 during the first month of  
555 rollout. *Vaccine* **2021**, doi:10.1016/j.vaccine.2021.08.083.

- 556 25. Temsah, M.H.; Barry, M.; Aljamaan, F.; Alhuzaimi, A.N.; Al-Eyadhy, A.; Saddik, B.;  
557 Alsohime, F.; Alhaboob, A.; Alhasan, K.; Alaraj, A.; et al. SARS-CoV-2 B.1.1.7 UK Variant of  
558 Concern Lineage-Related Perceptions, COVID-19 Vaccine Acceptance and Travel Worry  
559 Among Healthcare Workers. *Front Public Health* **2021**, *9*, 686958,  
560 doi:10.3389/fpubh.2021.686958.
- 561 26. Rabinowitz, L.G.; Rabinowitz, D.G. Women on the Frontline: A Changed Workforce and the  
562 Fight Against COVID-19. *Acad Med* **2021**, *96*, 808-812, doi:10.1097/acm.0000000000004011.
- 563 27. Alhasan, K.; Aljamaan, F.; Temsah, M.H.; Alshahrani, F.; Bassrawi, R.; Alhaboob, A.; Assiri,  
564 R.; Alenezi, S.; Alaraj, A.; Alhomoudi, R.I.; et al. COVID-19 Delta Variant: Perceptions,  
565 Worries, and Vaccine-Booster Acceptability among Healthcare Workers. *Healthcare (Basel)*  
566 **2021**, *9*, doi:10.3390/healthcare9111566.
- 567 28. Al-Sanafi, M.; Sallam, M. Psychological Determinants of COVID-19 Vaccine Acceptance  
568 among Healthcare Workers in Kuwait: A Cross-Sectional Study Using the 5C and Vaccine  
569 Conspiracy Beliefs Scales. *Vaccines (Basel)* **2021**, *9*, doi:10.3390/vaccines9070701.
- 570 29. Karim, S.S.A.; Karim, Q.A. Omicron SARS-CoV-2 variant: a new chapter in the COVID-19  
571 pandemic. *Lancet* **2021**, *398*, 2126-2128, doi:10.1016/s0140-6736(21)02758-6.
- 572 30. Araf, Y.; Akter, F.; Tang, Y.D.; Fatemi, R.; Parvez, M.S.A.; Zheng, C.; Hossain, M.G. Omicron  
573 variant of SARS-CoV-2: Genomics, transmissibility, and responses to current COVID-19  
574 vaccines. *J Med Virol* **2022**, doi:10.1002/jmv.27588.
- 575 31. Cele, S.; Jackson, L.; Houry, D.S.; Khan, K.; Moyo-Gwete, T.; Tegally, H.; San, J.E.; Cromer,  
576 D.; Scheepers, C.; Amoako, D.G.; et al. Omicron extensively but incompletely escapes Pfizer  
577 BNT162b2 neutralization. *Nature* **2021**, doi:10.1038/s41586-021-04387-1.
- 578 32. Greaney, A.J.; Starr, T.N.; Gilchuk, P.; Zost, S.J.; Binshtein, E.; Loes, A.N.; Hilton, S.K.;  
579 Huddleston, J.; Eguia, R.; Crawford, K.H.D.; et al. Complete Mapping of Mutations to the  
580 SARS-CoV-2 Spike Receptor-Binding Domain that Escape Antibody Recognition. *Cell Host*  
581 *Microbe* **2021**, *29*, 44-57.e49, doi:10.1016/j.chom.2020.11.007.
- 582 33. Ferré, V.M.; Peiffer-Smadja, N.; Visseaux, B.; Descamps, D.; Ghosn, J.; Charpentier, C.  
583 Omicron SARS-CoV-2 variant: What we know and what we don't. *Anaesth Crit Care Pain*  
584 *Med* **2021**, *41*, 100998, doi:10.1016/j.accpm.2021.100998.
- 585 34. Barry, M.; Temsah, M.H.; Alhuzaimi, A.; Alamro, N.; Al-Eyadhy, A.; Aljamaan, F.; Saddik,  
586 B.; Alhaboob, A.; Alsohime, F.; Alhasan, K.; et al. COVID-19 vaccine confidence and  
587 hesitancy among health care workers: A cross-sectional survey from a MERS-CoV  
588 experienced nation. *PLoS One* **2021**, *16*, e0244415, doi:10.1371/journal.pone.0244415.
- 589 35. Li, M.; Luo, Y.; Watson, R.; Zheng, Y.; Ren, J.; Tang, J.; Chen, Y. Healthcare workers' (HCWs)  
590 attitudes and related factors towards COVID-19 vaccination: a rapid systematic review.  
591 *Postgrad Med J* **2021**, doi:10.1136/postgradmedj-2021-140195.
- 592 36. EEOC. EEOC Issues Updated COVID-19 Technical Assistance. Available online:  
593 <https://www.eeoc.gov/newsroom/eeoc-issues-updated-covid-19-technical-assistance>  
594 (accessed on 27 Dec 2021).
- 595 37. Weber, D.J.; Al-Tawfiq, J.A.; Babcock, H.M.; Bryant, K.; Drees, M.; Elshaboury, R.; Essick, K.;  
596 Fakhri, M.; Henderson, D.K.; Javaid, W.; et al. Multisociety statement on coronavirus disease  
597 2019 (COVID-19) vaccination as a condition of employment for healthcare personnel. *Infect*  
598 *Control Hosp Epidemiol* **2021**, *1-9*, doi:10.1017/ice.2021.322.

- 599 38. Klompas, M.; Pearson, M.; Morris, C. The Case for Mandating COVID-19 Vaccines for  
600 Health Care Workers. *Ann Intern Med* **2021**, *174*, 1305-1307, doi:10.7326/m21-2366.
- 601 39. Olick, R.S.; Shaw, J.; Yang, Y.T. Ethical Issues in Mandating COVID-19 Vaccination for  
602 Health Care Personnel. *Mayo Clin Proc* **2021**, *96*, 2958-2962, doi:10.1016/j.mayocp.2021.10.020.
- 603 40. Al-Metwali, B.Z.; Al-Jumaili, A.A.; Al-Alag, Z.A.; Sorofman, B. Exploring the acceptance of  
604 COVID-19 vaccine among healthcare workers and general population using health belief  
605 model. *J Eval Clin Pract* **2021**, *27*, 1112-1122, doi:10.1111/jep.13581.
- 606 41. O'Donohue, L.S.; Fletcher-Gutowski, S.; Sidhu, A.; Verma, A.; Phillips, T.C.; Misra, P.G.  
607 Mask use among health care workers and feelings of safety at work pre- and post-  
608 COVID-19 vaccine. *Am J Infect Control* **2021**, doi:10.1016/j.ajic.2021.11.009.
- 609 42. Singhal, T. The Emergence of Omicron: Challenging Times Are Here Again! *Indian J Pediatr*  
610 **2022**, 1-7, doi:10.1007/s12098-022-04077-4.
- 611 43. Mallapaty, S. Omicron-variant border bans ignore the evidence, say scientists. In *Nature*;  
612 England, 2021; Volume 600, p. 199.
- 613 44. Maraqa, B.; Nazzal, Z.; Rabi, R.; Sarhan, N.; Al-Shakhra, K.; Al-Kaila, M. COVID-19 vaccine  
614 hesitancy among health care workers in Palestine: A call for action. *Prev Med* **2021**, *149*,  
615 106618, doi:10.1016/j.ypmed.2021.106618.
- 616 45. Ahmad Alajlan, S.; Alhusseini, N.K.; Mohammed Basheeruddin Asdaq, S.; Mohzari, Y.;  
617 Alamer, A.; Alrashed, A.A.; Alamri, A.S.; Alsanie, W.F.; Alhomrani, M. The impact of  
618 lockdown strategies on the basic reproductive number of coronavirus (COVID-19) cases in  
619 Saudi Arabia. *Saudi J Biol Sci* **2021**, *28*, 4926-4930, doi:10.1016/j.sjbs.2021.06.047.
- 620 46. Albagmi, F.M.; AlNujaidi, H.Y.; Al Shawan, D.S. Anxiety Levels Amid the COVID-19  
621 Lockdown in Saudi Arabia. *Int J Gen Med* **2021**, *14*, 2161-2170, doi:10.2147/ijgm.s312465.
- 622
